1 **Aquatic long-term persistence of *Francisella tularensis* ssp. *holarctica* is**  
2 **driven by water temperature and transition to a viable but non-culturable**  
3 **state**

4 Camille D. Brunet<sup>1</sup>, Julien Peyroux<sup>1,2</sup>, Léa Pondérand<sup>3,4</sup>, Stéphanie Bouillot<sup>3</sup>, Thomas Girard<sup>4</sup>,  
5 Éric Faudry<sup>3</sup>, Max Maurin<sup>1,4</sup>, Yvan Caspar<sup>3,4\*</sup>

6

7 <sup>1</sup> Univ. Grenoble Alpes, CNRS, Grenoble INP, TIMC, 38000 Grenoble, France.

8 <sup>2</sup> Laboratoire d'Informatique de Grenoble, Bâtiment IMAG, 38401 Saint Martin d'Hères

9 <sup>3</sup> Univ. Grenoble Alpes, CEA, CNRS, IBS, 38000 Grenoble, France

10 <sup>4</sup> Centre National de Référence des Francisella, CHU Grenoble Alpes, 38000 Grenoble, France.

11

12

13 \* Corresponding author:

14 Dr Yvan Caspar, CHU Grenoble Alpes, Institut de Biologie et de Pathologie, CS10217, 38043,

15 15 Grenoble, Cedex 9, France, [ycaspar@chu-grenoble.fr](mailto:ycaspar@chu-grenoble.fr)

16

17 **Abstract**

18 *Francisella tularensis* is a highly virulent bacterium causing tularemia zoonosis. An increasing  
19 proportion of infections occur through contaminated hydro-telluric sources, especially for the  
20 subspecies *holarctica* (*Fth*). Although this bacterium has been detected in several aquatic  
21 environments, the mechanisms of its long-term persistence in water are not yet elucidated. We  
22 evaluated the culturability and the viability of a virulent *Fth* strain in independent microcosms  
23 filled with nutrient-poor water. At 37°C, the bacteria remained culturable for only one week,  
24 while culturability was extended to 6 weeks at 18°C and up to 11 weeks at 4°C. However, while  
25 the viability of the bacteria declined similarly to culturability at 37°C, the viability of the  
26 bacteria remained stable overtime at 18°C and 4°C for more than 24 months, long after loss of  
27 culturability. We identified water temperature as one of the major factors driving the aquatic  
28 survival of *Fth* through a transition of the whole *Fth* population in a viable but non-culturable  
29 (VBNC) state. Low temperature of water ( $\leq 18^\circ\text{C}$ ) favors the persistence of the bacteria in a  
30 VBNC state, while a temperature above 30°C kills culturable and VBNC *Fth* bacteria. These  
31 findings provide new insights into the environmental cycle of *Francisella tularensis* that  
32 suggest that the yet unidentified primary reservoir of the subspecies *holarctica* may be the  
33 aquatic environment itself in which the bacteria could persist for months or years without the  
34 need for a host.

35

36 **Keywords**

37 *Francisella tularensis*, tularemia, viable but non-culturable, dormancy, water microbiology

38

## 39 **Introduction**

40 *Francisella tularensis* is a Gram-negative bacterium causing the zoonosis tularemia. It is a  
41 highly virulent human pathogen classified in category A of potential agents of biological threat  
42 by the US Centers for Disease Control and Prevention [1]. Two subspecies are associated with  
43 human tularemia: *F. tularensis* ssp. *tularensis* (*Ftt*) (type A strains), only present in North  
44 America; and *F. tularensis* ssp. *holarctica* (*Fth*) (type B strains), spread all over the Northern  
45 Hemisphere, with a few strains identified in the last decade in Australia [1,2].

46 Terrestrial and aquatic lifecycles of *F. tularensis* have been described but remain not fully  
47 characterized despite many decades of research [3]. Especially, the survival of the bacteria in  
48 hydro-telluric environments is still under active investigation [4,5]. The terrestrial animal  
49 reservoir of *F. tularensis* is large, but lagomorphs and small rodents are considered primary  
50 sources of human infections. Recent data corroborate that the aquatic lifecycle of the subspecies  
51 *Fth* may be predominant over the terrestrial lifecycle, in particular for the persistence of the  
52 disease in the environment, as initially suggested by Jellison [5,6]. This aquatic cycle involves  
53 mainly mosquitoes, mosquito larvae, and aquatic rodents [3]. In Northern Europe, mosquitos  
54 can transmit *Fth* after larva contamination in water and consequently be responsible for large  
55 outbreaks [7–10]. Cases of tularemia related to water have also been described after an aquatic  
56 activity (e.g., swimming or canyoning) [11,12] or through drinking or using contaminated water  
57 [13,14].

58 Some studies suggested the potential persistence of this bacterium in aquatic environments over  
59 long periods. Genomic studies have confirmed that diverse clones of *Fth* survive for a  
60 prolonged period and that a single clone may be responsible for human or animal cases of  
61 tularemia over several decades (up to 70 years) [15–17]. Multiple independent respiratory  
62 infections with *Fth* strains acquired from the environment over a short period were observed  
63 during an outbreak in Sweden in 2010 and in France in 2018, arguing in favor of environmental

64 changes acting as the trigger of these outbreaks [17,18]. Analysis of exposition factors  
65 suggested environmental contamination, presumably through aerosols originating from an  
66 unidentified environmental reservoir [5]. Low temperature and salinity have been identified to  
67 impact the duration of culturability of *Fth*. It has been described that this bacterium can remain  
68 culturable up to 70 days at 8°C [19,20], ten days in fresh water at room temperature, 21 days in  
69 seawater, and 45 days in brackish water [21]. Recently while studying biofilm formation of *F.*  
70 *tularensis* in aquatic environments, Golovliov *et al.* identified that *Fth* remained culturable and  
71 infectious in a mice model after 24 weeks of incubation at 4°C in low nutrient water containing  
72 9 g/L of NaCl. They suggested that this improved survival at low temperature in freshwater  
73 may be a critical mechanism to help the bacteria overwinter and survive between host-  
74 associated replication events [4]. In such situations the bacteria may choose to switch to a  
75 dormancy state that reduces competition with actively growing cells. Among potential  
76 persistence and/or quiescence mechanisms identified in bacteria, bacterial switch to a viable  
77 but non-culturable (VBNC) state that has been poorly studied in virulent *F. tularensis* strains  
78 [20,22]. Initially described in 1982 for *Escherichia coli* and *Vibrio cholerae* [23], the VBNC  
79 state corresponds to bacteria that lose their ability to grow, may change their shape and lose  
80 their virulent traits, although remaining still alive. The VBNC state is induced during a stress  
81 such as nutrient starvation, physicochemical changes of the environment, or thermal shock. It  
82 has already been identified that the virulence-attenuated live vaccine strain (LVS) of *Fth* is able  
83 to survive in a VBNC state at least 140 days at 8°C [20]. Survival of a fluorescent *Fth* strain in  
84 a VBNC state up to 38 days has also been described in the control conditions of a co-culture  
85 experiment with protozoan using a gfp-modified *Fth* strain [22].

86 Consequently, our goal was to investigate the role of water temperature and salinity on the  
87 persistence of a virulent human strain of *Fth* in water and explore the possibility of a transition  
88 of *Fth* into a VBNC state triggered by these factors.

89

## 90 **Material and methods**

### 91 *Bacterial strains and preparation of aquatic microcosms*

92 All culture assays were performed in a BSL3 laboratory. We used the fully virulent *Fth* biovar  
93 I clinical strain CHUGA-Ft6 (genome accession: VJBK000000000) [15]. This strain was grown  
94 on Polyvitex-enriched chocolate agar plates (PVX, BioMérieux, Marcy l'Etoile, France)  
95 incubated at 37°C in a 5% CO<sub>2</sub>-enriched atmosphere. The *F. tularensis* collection of French  
96 National Reference Center for *Francisella* is approved by the Agence Nationale de Sécurité du  
97 Médicament et des produits de santé (France) (ANSM, authorization number ADE-103892019-  
98 7).

99 Six independent aquatic microcosms were defined, consisting of 6 aliquots of the same  
100 environmental water sample from the Rhône-Alpes region in France (send for analysis in the  
101 water laboratory Abiolab-Asposan, Monbonnot-Saint-Martin, France; Table S1). Microcosms  
102 were incubated at 4°C, 18°C, and 37°C, and supplemented with either 0 or 10 g/L of NaCl.  
103 Each condition was tested in biological triplicate. Bacterial suspensions were prepared in PBS  
104 and adjusted to 10<sup>9</sup> CFU.ml<sup>-1</sup>, and 25 mL were added to 225 mL of environmental water  
105 previously sterilized using a 0,22µm filter.

### 106 *Monitoring of culturability and viability of bacteria in water*

107 The culturability and viability of bacteria in the six environmental models were monitored each  
108 week. The culturability was measured by CFU counts after plating 100µL of serials dilutions  
109 of each microcosm and on PVX agar plates after 48h incubation at 37°C. The viability of the  
110 bacteria was determined using qPCR after PMAxx™ Dye treatment (Biotium San Francisco,  
111 US) allowing specific DNA amplification of viable bacteria only. In brief, 1 mL of bacteria  
112 suspension was added to 250 µL of enhancer for Gram-negative Bacteria (Biotium San

113 Francisco, US). PMAxx™ Dye was dissolved in H<sub>2</sub>O at 5mM and added to a bacterial solution  
114 at a final concentration of 25μM. After 10 min of incubation in the dark, samples were exposed  
115 30 min to light with GloPlate™ Blue LED Illuminator (Biotum, San Francisco, US). Bacterial-  
116 PMA suspensions were centrifugated at 11,000g for 10 min, and DNA was extracted using  
117 NucleoSpin Blood Kit (Macherey Nagel, Hoerd, France) according to manufacturers'  
118 recommendations. At each sampling point, DNA extraction of 1 mL of bacterial suspension  
119 without PMA treatment was realized in parallel to determine amplification of total DNA present  
120 in the samples. At each sampling point, control with dead bacteria for PMAxx™ Dye was  
121 realized using a 1 mL suspension of bacteria previously lysed. Each qPCR reaction contained  
122 10μL of Master Mix EvaGreen 2X (Biotium, San Francisco, US), 1μM of each primer, 5μL of  
123 DNA template, and 1μL of sterile H<sub>2</sub>O. The 23S ribosomal RNA gene was amplified using the  
124 following forward (5'-CATACGAACAAGTAGGACGG-3') and reverse (5'-  
125 GCAAGCGGTTTCAGATTCTA-3'). The qPCR was performed using a LightCycler 480  
126 instrument (Roche, Meylan, France) and SYBRGreen channel, with the following protocol:  
127 initial denaturation at 95°C for 5 min, followed by 40 cycles of 95°C for 5s and 60°C for 30s.  
128 Melting curve analysis was performed from 57°C to 99°C. A negative control (H<sub>2</sub>O) was  
129 included in each qPCR run. The viability was evaluated by the Cycle threshold (Ct) of DNA  
130 amplification of living Bacteria. Statistical analyses were performed by student t-test.

131 To compare the shape and the length of VBNC and culturable bacteria, pictures of bacteria  
132 incubated in water at 18°C without NaCl one hour for culturable bacteria, and 6 months for  
133 VBNC bacteria labeled with Syto9 were analyzed by Image J software and Microbe J plugging  
134 [24]. Bacterial morphology was described by parameters: area (0.1-1.2μm); length (0.2-1.4  
135 μm); width (0-1.4 μm); circularity (0.3-max μm). Parameters were calculated for 1055 bacteria  
136 in each sample.

137 *Bacterial viability of VBNC cells after temperature change of microcosm*

138 Several months after the loss of culturability of *Fth* in water, 5 mL of microcosm at 4°C were  
139 transferred at 18°C, 30°C and 37°C. 5 mL of microcosm at 18°C were transferred at 4°C, 30°C  
140 and 37°C. After 7 and 14 days, the viability was evaluated by qPCR after PMAxx™ Dye  
141 treatment. Statistical analyses were performed using R (version 4.0.3) for the comparison of  
142 multiple groups by one-way ANOVA. False discovery rate (FDR) correction was applied for  
143 pairwise t-tests.

#### 144 *Biofilm quantification*

145 Biofilm quantification was performed on the bacterial suspensions evolved in nutrient-poor  
146 water in T75 culture flasks, one year at 4°C, six months at 18°C, or four months at 37°C after  
147 inoculation. Negative control consisted in fresh culturable bacteria incubated for one hour in  
148 water. Each condition was tested in a biological duplicate. After incubation, the culture medium  
149 was aspirated, and flasks were washed three times with PBS. 5 mL of Crystal violet (0,2% w/v)  
150 were added, and flasks were re-incubated for 15 minutes. Crystal violet was washed three times  
151 with PBS, and biofilm was solubilized by 1 mL of ethanol 95%. 200µL of this biofilm was  
152 added to microtiter plates in three wells, and biofilm was quantified by measuring absorbance  
153 at 570nm. Statistical analyses were performed by student t-test.

154

## 155 **Results**

### 156 *Culturability of F. tularensis ssp. holarctica extends to 11 weeks at low temperature*

157 In low nutrient-containing water, at 37°C, the culturability of the virulent clinical strain of *Fth*  
158 biovar I decreased from 10<sup>8</sup> to 0 CFU/mL in 8 days (Figure 1a). However, the culturability of  
159 bacteria extended dramatically when reducing the temperature of water microcosms. At 18°C,  
160 bacteria decreased from 10<sup>8</sup> to 0 CFU/mL in 6 weeks (Figure 1b). At 4°C, culturability of  
161 bacteria declined even more slowly with a complete absence of growing colonies only 11 weeks

162 after inoculation of the water sample (Figure 1c). At 37°C, NaCl concentration enrichment of  
163 the microcosm at 10g/L conferred only a slight transient survival advantage to the bacteria  
164 (Figure 1a). No significant differences were observed at 18°C or 4°C.

165 *F. tularensis ssp. holarctica* switched to VBNC state at low temperature in nutrient-poor water

166 The virulent clinical strain of *Fth* biovar I did not survive for more than eight days at 37°C in  
167 nutrient-poor water. In this microcosm, viability was correlated with culturability. qPCR-PMA  
168 Ct value increased from  $12.1 \pm 0.5$  to  $25.8 \pm 0.2$  after eight days in nutrient-poor water without  
169 NaCl showing a strong reduction of viable bacteria in this microcosm. In comparison, for each  
170 condition the Ct value of the controls with dead bacteria, i.e., lysed and PMAxx™ Dye treated  
171 bacteria, was  $22.7 \pm 3.9$ . On the opposite, while the culturability declined, almost all bacteria  
172 remained alive during the eight-week study at 18°C and the 14 weeks study at 4°C (Figures 1e  
173 and 1f). The Ct value of viable bacteria stayed stable at  $12.5 \pm 1.3$  for all four conditions during  
174 the whole experiment and for more than two weeks after the loss of culturability (Water at 4°C  
175 without NaCl, Ct range: 11.8-13.8. Water at 4°C with NaCl, Ct range: 11-13.5. Water at 18°C  
176 without NaCl, Ct range: 12-13.6. Water at 18°C with NaCl, Ct range: 10.4-13.7). Two replicates  
177 were kept in the water for 24 months and tested again. Interestingly, the Ct of PMA-qPCR  
178 remained unchanged (13.2 and 14.1). Thus, we observed that roughly the full initial bacterial  
179 inoculum switched at low temperature to viable but non-culturable state corresponding to the  
180 definition of transition into VBNC state. It is interesting to note that the temperatures of 4°C  
181 and 18°C differentially affected culturability but not viability. Viability of the bacteria in the  
182 microcosms at 4 and 18°C was confirmed by the Live/Dead® BacLight™ assay (Figure S1).

183 The addition of 10g/L NaCl conferred a slight transient survival advantage to the bacteria at  
184 37°C. On the fourth day, there was a 4-log difference (p-value = 0.0005) between the two  
185 conditions but qPCR-PMA Ct value also increased from  $11.4 \pm 1.1$  to  $22.6 \pm 0.4$  showing that all  
186 the bacteria were dead in eight days in both conditions (Figure 1d). The addition of salt to the



187 microcosm did not significantly affect the culturability and viability of the bacteria at 4°C and  
188 18°C (p-value > 0,05 for each time points, Figures 1b,c,e,f).

189 To visualize bacterial morphology after transition into VBNC state, fresh bacteria suspended  
190 one hour in water and VBNC bacteria sampled five months after the loss of culturability were  
191 labeled with an anti- *F. tularensis* LPS antibody and observed with oil immersion objective  
192 100X. After the loss of culturability the anti-LPS antibody was still able to bind to the LPS of  
193 *Fth* strain and microscopic examination suggested a reduced length of VBNC bacteria (Figure  
194 S2). Modification of the size of the bacteria was confirmed by Syto9 staining and image analysis  
195 that showed that VBNC bacteria were smaller than culturable *Fth* with respectively an area of  
196  $0.31 \pm 0.19 \mu\text{m}^2$  and  $0.47 \pm 0.27 \mu\text{m}^2$ ; a length of  $0.62 \pm 0.22 \mu\text{m}$  and  $0.76 \pm 0.26 \mu\text{m}$ ; a perimeter  
197 of  $1.85 \pm 0.63 \mu\text{m}$  and  $2.29 \pm 0.75 \mu\text{m}$  (p-value <0.0001 for each parameters). However,  
198 circularity was not statistically different ( $0.97 \pm 0.03$  for both culturable and VBNC *Fth* samples;  
199 p-value = 0.47) (Figure S3).

#### 200 *High water temperatures inactivated F. tularensis ssp. holarctica* VBNC bacteria

201 After their transition into the VBNC state, the viability of the bacteria was still dependent on  
202 the temperature of the water. Several months after the loss of culturability, when VBNC bacteria  
203 were moved from 4°C to 18°C and vice versa, the temperature change did not influence the  
204 viability of the bacteria during after 14 days of incubation (4°C to 18°C: Ct value from  $13.8 \pm 0.8$   
205 to  $14.3 \pm 2.5$ ; 18°C to 4°C: Ct value from  $12.7 \pm 1.1$  to  $15.3 \pm 3.7$ ). However, when the temperature  
206 was shifted to 30°C, the viability of VBNC bacteria significantly declined in 14 days (4°C to  
207 30°C: Ct value from  $13.8 \pm 0.8$  to  $20 \pm 1.5$ ; 18°C to 30°C: Ct value from  $12.7 \pm 1.1$  to  $20 \pm 6$ ) (p-  
208 value < 0.05). Moreover, when placed at 37°C, viability of VBNC bacteria declined in 14 days  
209 under the threshold corresponding to dead bacteria only (4°C to 37°C: Ct value from  $13.8 \pm 0.8$   
210 to  $23.8 \pm 2.5$ ; 18°C to 37°C: Ct value from  $12.7 \pm 1.1$  to  $26.3 \pm 3.3$ ) (p-value <0.05) (Figure 2).

211 *Virulent F. tularensis ssp. holarctica strain was able to form biofilm in water*

212 Optical density at 570 nm of the water flasks containing fresh bacteria after crystal violet  
213 staining was  $0.14 \pm 0.01$  while optical density of the flasks containing the *Fth* VBNC bacteria  
214 were increased twofold:  $0.27 \pm 0.01$  for VBNC bacteria after one year at  $4^{\circ}\text{C}$  (p-value = 0.019)  
215 and  $0.3 \pm 0.01$  (p-value < 0.0001) for VBNC bacteria after six months at  $18^{\circ}\text{C}$ . On the opposite,  
216 optical density of the flasks containing dead *Fth* bacteria (4 months at  $37^{\circ}\text{C}$ ) was  $0.15 \pm 0.03$   
217 showing no significant biofilm production compared to fresh bacteria (p-value = 0.7) (Figure  
218 3). Microscopic observation of the stained flasks showed small Gram-negative coccobacilli  
219 embedded and surrounded by a structure resembling a biofilm (Figure S4).

220

## 221 **Discussion**

222 Although the presence and potential survival of *Fth* in the aquatic environment have been  
223 identified in several studies [25–29], the mechanisms of its persistence and its precise  
224 environmental reservoir remain unclear. According to current descriptions of the aquatic cycle  
225 of *Fth*, aquatic environments may be initially contaminated by *F. tularensis* through dead  
226 animals or excrements of infected animals [3]. However, how these bacteria can persist for  
227 weeks or even years within these environments remains to be elucidated. Following recent work  
228 showing extended culturability of *Fth* at  $4^{\circ}\text{C}$  in water, we hypothesized that in environmental  
229 water, this bacterium might also survive in a dormancy form such as the VBNC state. This  
230 hypothesis would help the bacteria to survive in hostile environments, as described for several  
231 other Gram-negative bacteria, thus limiting nutrient starvation and competition with other  
232 microorganisms [20,22,30,31].

233 We observed that a clinical strain of *Fth* remained culturable for more than 11 weeks of  
234 incubation in nutrient-poor water at  $4^{\circ}\text{C}$ ; more than one month at  $18^{\circ}\text{C}$  but only one week at

235 37°C, consistent with previously published data on the culturability of *Fth* FSC200 and LVS  
236 [4,19–21]. However, we show here that culturability is not representative of the viability of *Fth*  
237 strains since the bacterium may switch to the VBNC state under conditions that remain to be  
238 fully characterized. Indeed, our results showed prolonged survival in nutrient-poor water at 4°C  
239 and 18°C of a virulent *Fth* biovar I strain long after the bacterium had lost its ability to grow on  
240 an agar plate. Our main approach assessing bacterial survival is based on qPCR amplification  
241 of DNA from bacteria preincubated with PMAxx™ Dye widely used to detect and determine  
242 the viability of human pathogens [32]. As PMAxx™ Dye does not pass through intact bacterial  
243 membranes, it cannot bind to the DNA of living bacteria although binding to the DNA of dead  
244 bacteria and extracellular DNA is possible. While the amount of DNA from living bacteria  
245 decreased similarly to culturability at 37°C, it remained remarkably stable over time at 4°C and  
246 18°C during the whole experiment matching the definition of bacterial switch into a VBNC  
247 state as the majority of initial bacteria remained viable despite the loss of culturability and  
248 results were confirmed by Live/Dead® BacLight™ assay [33]. Morphological analysis showed  
249 that VBNC *Fth* bacteria are smaller as they have a reduced length, perimeter and area compared  
250 to the culturable forms.

251 Like the seeds of plants, VBNC forms allow preserving the genetic heritage of bacteria in  
252 unfavorable conditions [34]. *Fth* bacteria could then remain viable for a very long time as  
253 VBNC bacteria in aquatic environments without the need for a host. When more favorable  
254 conditions return, VBNC bacteria revert to their vegetative state, usually recovering their  
255 culturability and virulence. Reversion after switch into VBNC state remains to be demonstrated  
256 for *Fth* in further studies.

257 Bacteria evolve to a VBNC state to withstand environmentally induced stresses. In our  
258 experiments, incubation of *Fth* in water at 37°C was the most deleterious environmental  
259 condition. It did not induce a transition to the VBNC state since bacterial mortality correlated

260 with loss of culturability. Therefore, it appears that conditions that are too harmful to *Fth* and  
261 associated with a loss of their culturability in one week do not allow the development of VBNC  
262 bacteria. The most favorable conditions for *Fth* survival are close to environmental conditions  
263 in tularemia endemic areas, i.e., areas of water temperatures ranging from 4 to 20°C between  
264 winter and summer periods [4,28]. Importantly after the switch into VBNC state, *Fth* viability  
265 was still dependent on the temperature of the water. Over 30°C, the viability of VBNC bacteria  
266 declined, and was completely abolished after seven days at 37°C. Thus, the temperature tipping  
267 point no longer supporting the transition of *Fth* to the VBNC state is between 18°C and 30°C.  
268 Our results support the aquatic environmental distribution of *Fth* in Northern regions where  
269 water temperature may not often exceed the temperature limit killing bacteria in a VBNC state.  
270 The inter-tropical region, with higher water temperature, could therefore represents a physical  
271 limitation to spreading towards the southern hemisphere. The seasonality could also have a  
272 significant role in maintaining this environmental reservoir since the bacterial persistence is  
273 better in freshwater.

274 One other mode of persistence of bacteria in aquatic environments is biofilm formation, as  
275 observed for many bacteria like *Legionella pneumophila* [35]. Experimental studies have  
276 shown that environmental species of *Francisella* can form biofilms *in vitro* [36]. *F. novicida*  
277 starts biofilm formation after two hours and can be evidenced by crystal violet staining after  
278 24h [36]. In our study, we observed thin biofilm formation at the bottom of the flasks after six  
279 or 12 months of incubation of the microcosms at 18°C or 4°C but no biofilm formation after  
280 four months at 37°C. The biofilm was very fragile and therefore difficult to manipulate for  
281 observation. Biofilm formation of *Fth* strains may be a slow process requiring the viability of  
282 the bacteria for more than one week. The absence of biofilm formation of *F. tularensis* strains  
283 observed in the study of Golovliov *et al.* may be related to experimental conditions in axenic  
284 media not mimicking the natural aquatic environment [4]. Our study is closer to environmental

285 conditions, although it did not contain other competitive bacteria or predatory microorganism,  
286 because the *Fth* strain was incubated in a large volume of filtered French lake water. In our  
287 experiment, VBNC bacteria seemed to be embedded in a biofilm matrix, as previously shown  
288 for other pathogens (e.g., *Legionella pneumophila* and *Listeria monocytogenes*) [30,37]. In  
289 2016, Flemming *et al.* described biofilms as a “reservoir of VBNC bacteria,” especially in the  
290 starvation zones of the biofilm [35]. The biofilm and VBNC states play an essential role in the  
291 persistence of bacteria. Both allow the bacteria to survive in hostile environments while many  
292 pathogens lose their virulence properties after their switch into a VBNC state [31].

293 The persistence of *Fth* in aquatic environments in a VBNC state questions our capacity to detect  
294 and fight this bacterium in this specific reservoir. VBNC state may be a way of long-term  
295 bacterial persistence of *Fth* that cannot be detected by conventional culture-based techniques.  
296 The VBNC formation process likely explains that detection of *F. tularensis* in the aquatic  
297 environment has been obtained by species-specific molecular methods but very rarely by  
298 culture techniques [5]. In case of accidental or intentional dispersal of *F. tularensis*, the  
299 bacterium may thus survive for many months in water environments although undetected by  
300 culture methods. Identification of reactivation factors from the VBNC state into a more virulent  
301 and culturable state will have to be addressed in further experiments. It would help prevent and  
302 control waterborne sporadic and outbreak tularemia cases.

303 The impact of temperature may also have some effects on tularemia diagnosis in humans. This  
304 bacterium is usually grown at 37°C from clinical samples in only 10% of tularemia patients. In  
305 the light of this work, this temperature may not be optimal for isolating this bacterium from  
306 patients, animal samples, or environmental samples or even for bacterial counts after growth on  
307 an agar medium. Potential switch into VBNC state *in vivo* in infected tissues (especially lymph  
308 nodes) could also partly explain the failure to isolate this bacterium and may impact therapeutic  
309 outcome as VBNC bacteria usually exhibit increased antibiotic resistance because of a reduced

310 metabolism while biofilms also increase resistance to antibiotics [31,38]. These findings may  
311 have implications in treatment failures observed in 20 to 30% of patients, especially when the  
312 diagnosis is delayed, which could allow the bacteria to switch to a VBNC state *in vivo*.

313 Finally, all these data about the environmental survival of *Fth* in water at low temperature brings  
314 new important features allowing updating the aquatic cycle of this bacterium and proposing  
315 new hypotheses (Figure 4). Indeed, many other *Francisella* species are aquatic bacteria, making  
316 several parts of this aquatic cycle questionable [5]. What if *Fth* had rather evolved to adapt to  
317 an aquatic niche yet poorly characterized so far while becoming infectious for various mammal  
318 species, which are usually dead ends for the bacteria because it often kills its hosts [3]? Indeed,  
319 this bacterium has been identified in many aquatic areas, including the sea water, rivers, ponds  
320 [25–28,39,40], which might suggest that the primary reservoir of the subspecies *holarctica*  
321 could rather be the aquatic environment itself. This hypothesis could explain why a specific  
322 reservoir within the environment has not been identified despite decades of research. Some  
323 aquatic environments may thus represent the largest reservoir of *Fth* with the implication of  
324 aquatic rodents to maintain the cycle through bacterial inoculum amplification. Animals and  
325 humans may thus be infected directly from this environmental reservoir through water  
326 consumption or aerosols, explaining some sporadic human respiratory contaminations after  
327 outdoor activities. Aquatic environments could act as a primary source of human and animal  
328 infections or mosquito larvae contamination after reactivation of the VBNC state into virulent  
329 bacteria upon particular environmental conditions. Further studies will be necessary to  
330 determine: 1/ if *Fth* VBNC bacteria are also virulent and able to infect animals and mosquito  
331 larvae who are at the interface between the aquatic and the terrestrial cycle; 2/ to identify  
332 reactivation factors from the VBNC state towards the culturable and virulent state; 3/ to study  
333 interaction of VBNC *Fth* bacteria within biofilms and with amoeba.

334 In conclusion, our study demonstrated the extended persistence of a virulent strain of *Fth* in  
335 water up to 24 months through the formation of VBNC bacteria and thin biofilms. Water  
336 temperature appears as a major factor for bacterial survival in aquatic environments. It affects  
337 the culturability of the bacteria, the switch toward the VBNC state, and the viability of VBNC  
338 cells. Our findings reinforce the hypothesis of a long-term environmental aquatic reservoir of  
339 this pathogen.

340

341 **Funding**

342 This work and the doctorate allocation of Camille D. Brunet are funded by the Agence  
343 Innovation Defense, Direction Générale de l'Armement, France, [grant number Tulamibe  
344 ANR-17-ASTR-0024].

345 **Acknowledgment**

346 We thank the company Abiolab Asposan for the chemical analysis of the water. We thank  
347 Ludovic Sansoni for his help on the figure of aquatic cycle.

348 **Declaration of interest statement**

349 The authors declare no conflicts of interest



## 350 References

- 351 [1] A. Sjostedt, Tularemia: History, Epidemiology, Pathogen Physiology, and Clinical  
352 Manifestations, *Ann. N. Y. Acad. Sci.* 2007;110:1–29.
- 353 [2] J. Jackson, A. McGregor, L. Cooley, et al. *Francisella tularensis* Subspecies *holarctica*,  
354 Tasmania, Australia, 2011, *Emerg. Infect. Dis.* 2012;18:1484–1486.
- 355 [3] M. Maurin and M. Gyuranecz, Tularaemia: clinical aspects in Europe, *Lancet Infect. Dis.*  
356 2016;16:113–124.
- 357 [4] I. Golovliov, S. Bäckman, M. Granberg, et al. Long-term survival of virulent tularemia  
358 pathogens outside a host in conditions that mimic natural aquatic environments, *Appl.*  
359 *Environ. Microbiol.* 2021;027:13-20.
- 360 [5] A. Hennebique, S. Boisset and M. Maurin, Tularemia as a waterborne disease: a review,  
361 *Emerg. Microbes Infect.* 2019;8:1027–1042.
- 362 [6] W.L. Jellison, Tularemia in North America, 1930-1974, (1974).
- 363 [7] S. Bäckman, J. Näslund, M. Forsman, et al. Transmission of tularemia from a water source  
364 by transstadial maintenance in a mosquito vector, *Sci. Rep.* 2015;5:7793.
- 365 [8] O. Wik, Large tularaemia outbreak in Varmland, central Sweden, 2006, *Euro Surveill.*  
366 *Bull. Eur. Sur Mal. Transm. Eur. Commun. Dis. Bull.* 2006;11
- 367 [9] H. Eliasson and E. Bäck, Tularaemia in an emergent area in Sweden: An analysis of 234  
368 cases in five years, *Scand. J. Infect. Dis.* 2007;39:880–889.
- 369 [10] U. Jounio, M. Renko and M. Uhari, An outbreak of *holarctica*-type tularemia in pediatric  
370 patients, *Pediatr. Infect. Dis. J.* 2010;29:160–162.
- 371 [11] E. Peker, A. Ayaydin and N. Duran, Familial tularaemia, *Indian J. Med. Microbiol.*  
372 2009;27:272.
- 373 [12] B. Guerpillon, A. Boibieux, C. Guenne, et al. Keep an Ear Out for *Francisella tularensis*:  
374 Otomastoiditis Cases after Canyoneering, *Front. Med.* 2016;3.
- 375 [13] A. Karadenizli, M. Forsman, H. Şimşek, et al. Genomic analyses of *Francisella tularensis*  
376 strains confirm disease transmission from drinking water sources, Turkey, 2008, 2009 and  
377 2012, *Euro Surveill. Bull. Eur. Sur Mal. Transm. Eur. Commun. Dis. Bull.* 2015;20.
- 378 [14] T. Kantardjiev, I. Ivanov, T. Velinov, et al., Tularemia outbreak, Bulgaria, 1997-2005,  
379 *Emerg. Infect. Dis.* 2006;12:678–680.
- 380 [15] M. Kevin, G. Girault, Y. Caspar, et al. Phylogeography and Genetic Diversity of  
381 *Francisella tularensis* subsp. *holarctica* in France (1947–2018), *Front. Microbiol.*  
382 2020;11.
- 383 [16] C. Dwibedi, D. Birdsell, A. Lärkeryd, et al., Long-range dispersal moved *Francisella*  
384 *tularensis* into Western Europe from the East, *Microb. Genomics* 2016;2:100.
- 385 [17] A. Johansson, A. Lärkeryd, M. Widerström, et al. An Outbreak of Respiratory Tularemia  
386 Caused by Diverse Clones of *Francisella tularensis*, *Clin. Infect. Dis. Off. Publ. Infect.*  
387 *Dis. Soc. Am.* 2014;59:1546–1553.
- 388 [18] A. Mailles, R. Ollivier, F. Benezit, et al. [A tularemia outbreak in France in 2018  
389 suggesting a change in the epidemiology of the disease] *Médecine Mal. Infect.* 2019;49:4.  
390 French.
- 391 [19] S.E. Gilbert and L.J. Rose, Survival and persistence of nonspore-forming biothreat agents  
392 in water: Persistence of nonspore-forming biothreat agents in water, *Lett. Appl. Microbiol.*  
393 2012;55:189–194.
- 394 [20] M. Forsman, E.W. Henningson, E. Larsson, et al. *Francisella tularensis* does not manifest  
395 virulence in viable but non-culturable state, *FEMS Microbiol. Ecol.* 2000;31:217–224.
- 396 [21] Z.L. Berrada and S.R. Telford III, Survival of *Francisella tularensis* Type A in brackish-  
397 water, *Arch. Microbiol.* 2011;193:223–226.

- 398 [22] J. Thelaus, A. Andersson, P. Mathisen, et al. Influence of nutrient status and grazing  
399 pressure on the fate of *Francisella tularensis* in lake water: Role of nutrient and protozoa  
400 for the fate of *F. tularensis*, FEMS Microbiol. Ecol. 2009;67:69–80.
- 401 [23] H.S. Xu, N. Roberts, F.L. Singleton, et al. Survival and viability of nonculturable  
402 *Escherichia coli* and *Vibrio cholerae* in the estuarine and marine environment, Microb.  
403 Ecol. 1982;8:313–323.
- 404 [24] A. Ducret, E.M. Quardokus and Y.V. Brun, MicrobeJ, a tool for high throughput bacterial  
405 cell detection and quantitative analysis, Nat. Microbiol. 2016;1:16077.
- 406 [25] I. Janse, R.Q.J. Van der Plaats, A.M. de Roda Husman et al. Environmental Surveillance  
407 of Zoonotic *Francisella tularensis* in the Netherlands, Front. Cell. Infect. Microbiol.  
408 2018;8:140.
- 409 [26] T. Broman, J. Thelaus, A.-C. Andersson, et al. Molecular Detection of Persistent  
410 *Francisella tularensis* Subspecies *holarctica* in Natural Waters, Int. J. Microbiol. 2011:1–  
411 10.
- 412 [27] S. Duodu, P. Larsson, A. Sjödin, et al. The Distribution of *Francisella*-like Bacteria  
413 Associated with Coastal Waters in Norway, Microb. Ecol. 2012;64:370–377.
- 414 [28] C.D. Brunet, A. Hennebique, J. Peyroux, et al. Presence of *Francisella tularensis* subsp.  
415 *holarctica* DNA in the Aquatic Environment in France, Microorganisms 2021;9:1398.
- 416 [29] Z.L. Berrada and S.R. Telford, Diversity of *Francisella* Species in Environmental Samples  
417 from Martha’s Vineyard, Massachusetts, Microb. Ecol. 59 (2010), pp. 277–283.
- 418 [30] L. Li, N. Mendis, H. Trigui, et al. The importance of the viable but non-culturable state in  
419 human bacterial pathogens, Front. Microbiol. 2014;5
- 420 [31] J.D. Oliver, Recent findings on the viable but nonculturable state in pathogenic bacteria,  
421 FEMS Microbiol. Rev. 2010;34:415–425.
- 422 [32] L. Soto-Muñoz, N. Teixidó, J. Usall, et al. Development of PMA real-time PCR method  
423 to quantify viable cells of *Pantoea agglomerans* CPA-2, an antagonist to control the major  
424 postharvest diseases on oranges, Int. J. Food Microbiol. 2014;180:49–55.
- 425 [33] M. Ayrapetyan and J.D. Oliver, The viable but non-culturable state and its relevance in  
426 food safety, Curr. Opin. Food Sci. 2016;8:127–133.
- 427 [34] J.T. Lennon and S.E. Jones, Microbial seed banks: the ecological and evolutionary  
428 implications of dormancy, Nat. Rev. Microbiol. 2011;9:119–130.
- 429 [35] H.-C. Flemming, J. Wingender, U. Szewzyk, et al. Biofilms: an emergent form of bacterial  
430 life, Nat. Rev. Microbiol. 2016;14:563–575.
- 431 [36] C. Siebert, C. Villers, G. Pavlou, et al., *Francisella novicida* and *F. philomiragia* biofilm  
432 features conditioning fitness in spring water and in presence of antibiotics, PLOS ONE  
433 2020;15:0228591.
- 434 [37] J. Wingender and H.-C. Flemming, Biofilms in drinking water and their role as reservoir  
435 for pathogens, Int. J. Hyg. Environ. Health. 2011;204:417–423.
- 436 [38] S.J. Kassing and M.L. van Hoek, Genetic Determinants of Antibiotic Resistance in  
437 *Francisella*, Front. Microbiol. 2021;12:644855.
- 438 [39] P. Kaysser, E. Seibold, K. Mätz-Rensing, et al. Re-emergence of tularemia in Germany:  
439 Presence of *Francisella tularensis* in different rodent species in endemic areas, BMC  
440 Infect. Dis. 2008;8:157.
- 441 [40] J. Hightower, I.T. Kracalik, N. Vydayko et al. Historical distribution and host-vector  
442 diversity of *Francisella tularensis*, the causative agent of tularemia, in Ukraine, Parasit.  
443 Vectors 2014;7:453.
- 444

445 **Figures**

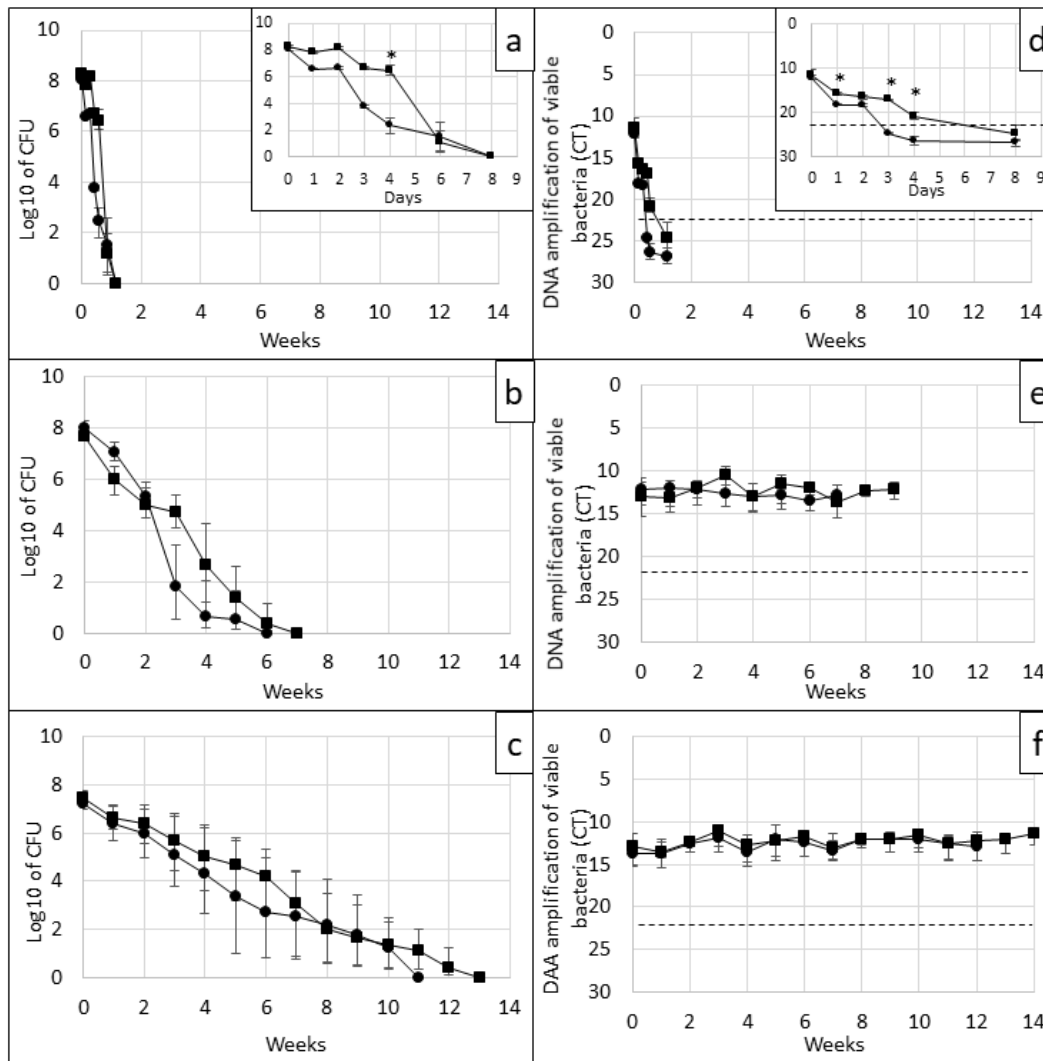

446

447 Figure 1: Culturability and viability of *F. tularensis* ssp. *holarctica* in nutrient-poor water.

448 Culturability (1a-c) and viability (1d-f) of *Fth* in nutrient-poor water at respectively 37°C (1a,d),

449 18°C (1b,e) and 4°C (1c,f). Culturability was measured by CFU counts after serial dilutions and

450 spreading on chocolate agar plates. Viability was evaluated by amplification of DNA after

451 PMAxx™ Dye treatment. Black circle: nutrient-poor water with 0 g/L NaCl; black square:

452 nutrient-poor water with 10 g/L NaCl.; Dotted line: mean Ct of all the controls performed on

453 dead populations at each sampling points. The results are expressed as the average of three

454 biological replicates. Data were analyzed by student t-test. \* p value <0,05 between samples

455 with and without NaCl.

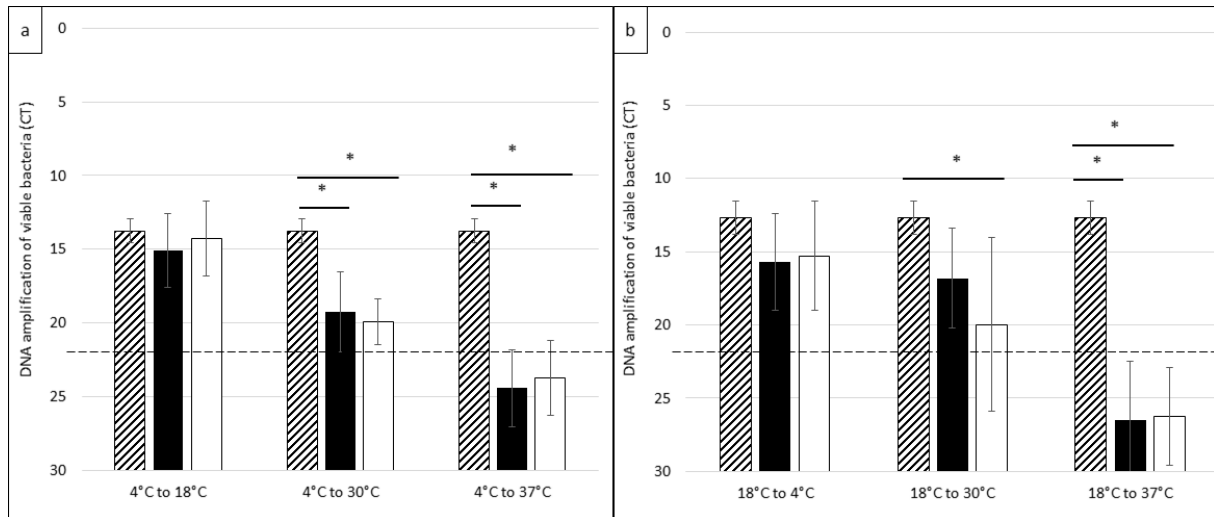

456

457 Figure 2: Viability of VBNC *F. tularensis* ssp. *holarctica* in water after a temperature change.

458 Several months after the loss of culturability of *Fth* in water, 5 mL of microcosm at 4°C were

459 transferred at 18°C, 30°C and 37°C (3a) and 5 mL of microcosm at 18°C were transferred at

460 4°C, 30°C and 37°C (3b). After 7 and 14 days, the viability was evaluated by qPCR after

461 PMAxx™ Dye treatment. Dash bars: Ct at day 0, black bars: Ct at day 7, white bars: Ct at day

462 14, dotted line: Ct of the control corresponding to average of a dead population. The results are

463 expressed as the average of three biological replicates. Data were analyzed by one-way

464 ANOVA with pairwise t-tests using FDR correction. \* p-value < 0.05.

465

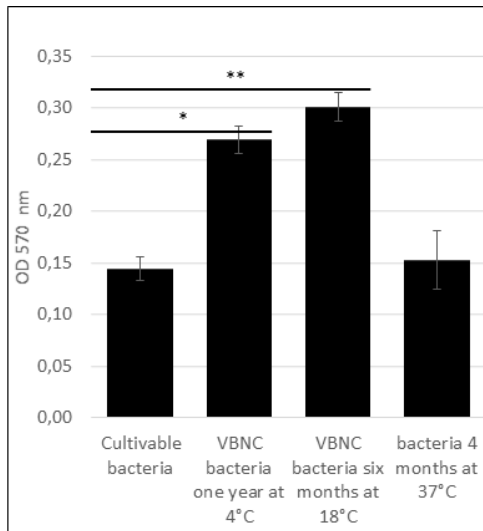

466

467 Figure 3: Quantitative measurement of biofilm formation of *F. tularensis* ssp. *holarctica* in  
468 VBNC state. *Fth* bacteria were incubated in nutrient-poor water for one hour for cultivable  
469 bacteria, one year at 4°C and six months at 18°C for VBNC and for four months at 37°C for  
470 non-persistent bacteria. Biofilm biomass was estimated by absorbance at 570 nm of crystal  
471 violet assay. The results are expressed as the average of three biological replicates. Data were  
472 analyzed by student t-test, \* p-value <0.05 \*\* p-value < 0.01.

473

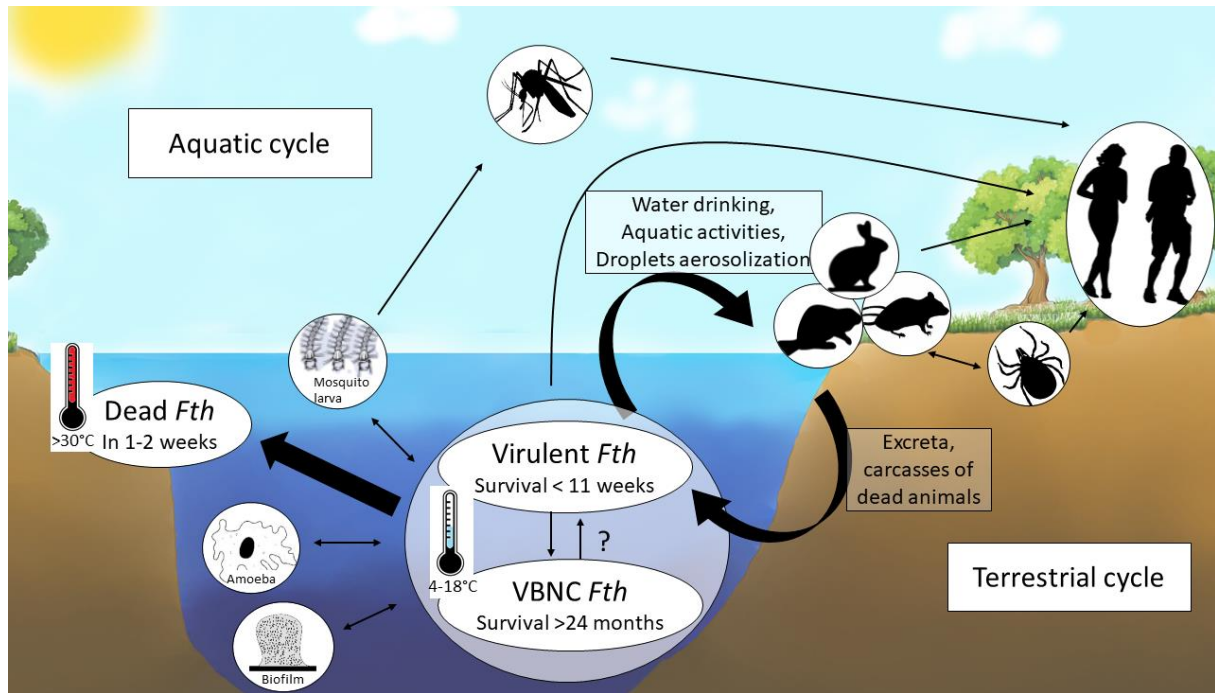

474

475 Figure 4: The hidden aquatic reservoir of *F. tularensis ssp. holarctica*?

476 We updated the current knowledge about the aquatic cycle of *Fth* according to the results of  
477 this work and proposed hypotheses that emerged from our observations. We showed that the  
478 survival of *Fth* in aquatic environments is driven by water temperature and transition into a  
479 VBNC state. While *Fth* culturability is prolonged in water at low temperatures (4-18°C), these  
480 low temperatures actually also allow the survival of the bacteria for months or years after  
481 transition into a VBNC state. On the opposite high temperatures (> 30°C) are associated to  
482 complete loss of culturability and loss of viability of the bacteria, even if the bacteria has already  
483 switched into the VBNC state. Thus, mammals or accidentally human  
484 may be contaminated from this long-term aquatic reservoir by water drinking, direct contact or  
485 by inhalation of contaminated droplets that could explain several respiratory tularemia cases  
486 related to environmental exposure only. When infected, wild animals can amplify the bacterial  
487 inoculum within the same aquatic environment or disperse the bacteria in other environments  
488 with their carcasses and feces and may contaminate other animals or exceptionally humans as  
489 described in the terrestrial cycle of the bacteria.
